# Supplementary material for: Pan-cancer analysis of genomic scar patterns caused by homologous repair deficiency (HRD)
Source: PubMed Central journal article supplement (PMC9184602; doi:10.1038/s41698-022-00276-6), 2022-06-09
Supplement: 41698_2022_276_MOESM1_ESM.pdf [file 41698_2022_276_MOESM1_ESM.pdf]

| <b>Abbreviation</b> | <b>Cancer Type</b>                                               |
|---------------------|------------------------------------------------------------------|
| ACC                 | Adrenocortical carcinoma                                         |
| BLCA                | Bladder Urothelial Carcinoma                                     |
| BRCA                | Breast invasive carcinoma                                        |
| CESC                | Cervical squamous cell carcinoma and endocervical adenocarcinoma |
| CHOL                | Cholangiocarcinoma                                               |
| COAD                | Colon adenocarcinoma                                             |
| DLBC                | Lymphoid Neoplasm Diffuse Large B-cell Lymphoma                  |
| ESCA                | Esophageal carcinoma                                             |
| GBM                 | Glioblastoma multiforme                                          |
| HNSC                | Head and Neck squamous cell carcinoma                            |
| KICH                | Kidney Chromophobe                                               |
| LAML                | Acute Myeloid Leukemia                                           |
| LGG                 | Brain Lower Grade Glioma                                         |
| LUSC                | Lung squamous cell carcinoma                                     |
| MESO                | Mesothelioma                                                     |
| OV                  | Ovarian serous cystadenocarcinoma                                |
| PAAD                | Pancreatic adenocarcinoma                                        |
| PCPG                | Pheochromocytoma and Paraganglioma                               |
| PRAD                | Prostate adenocarcinoma                                          |
| READ                | Rectum adenocarcinoma                                            |
| SARC                | Sarcoma                                                          |
| SKCM                | Skin Cutaneous Melanoma                                          |
| STAD                | Stomach adenocarcinoma                                           |
| TGCT                | Testicular Germ Cell Tumors                                      |
| THCA                | Thyroid carcinoma                                                |
| THYM                | Thymoma                                                          |
| UCEC                | Uterine Corpus Endometrial Carcinoma                             |
| UCS                 | Uterine Carcinosarcoma                                           |
| UVM                 | Uveal Melanoma                                                   |

**Supplementary Table 1:** The 33 cancer types included in the study.

| cancer type | n (H1a BA or HM) | n (H3) | AUC  | p       | p (corrected) | optimal cutpoint | J (cutpoint = 42) | J (optimal cutpoint) | J (loocv) |
|-------------|------------------|--------|------|---------|---------------|------------------|-------------------|----------------------|-----------|
| PANCAN      | 271              | 2961   | 0.89 | 1.3E-99 | 3.4E-98       | 43               | 0.67              | 0.68                 | 0.67      |
| BRCA        | 60               | 445    | 0.92 | 4.4E-26 | 5.7E-25       | 45               | 0.73              | 0.75                 | 0.74      |
| OV          | 113              | 113    | 0.88 | 6.1E-23 | 5.3E-22       | 54               | 0.52              | 0.65                 | 0.61      |
| PAAD        | 5                | 66     | 0.97 | 2.0E-04 | 1.3E-03       | 37               | 0.75              | 0.94                 | 0.74      |
| STAD        | 7                | 78     | 0.89 | 3.5E-04 | 1.8E-03       | 37               | 0.50              | 0.73                 | 0.59      |
| BLCA        | 4                | 53     | 0.99 | 6.8E-04 | 2.9E-03       | 66               | 0.83              | 0.98                 | 0.73      |
| PRAD        | 4                | 105    | 0.91 | 2.4E-03 | 8.9E-03       | 21               | 0.48              | 0.81                 | 0.56      |
| LUSC        | 10               | 43     | 0.78 | 3.0E-03 | 9.6E-03       | 49               | 0.40              | 0.51                 | 0.31      |
| HNSC        | 4                | 80     | 0.87 | 6.6E-03 | 1.9E-02       | 30 and 39        | 0.39              | 0.55                 | 0.11      |
| SARC        | 6                | 79     | 0.76 | 1.8E-02 | 4.7E-02       | 39               | 0.27              | 0.57                 | 0.40      |
| GBM         | 3                | 94     | 0.72 | 9.6E-02 | 1.9E-01       | 10               | -0.02             | 0.51                 | 0.18      |
| UCEC        | 14               | 61     | 0.60 | 1.3E-01 | 2.4E-01       | 62               | 0.34              | 0.56                 | 0.48      |
| CESC        | 6                | 64     | 0.63 | 1.5E-01 | 2.5E-01       | 27               | 0.24              | 0.32                 | -0.01     |
| SKCM        | 3                | 55     | 0.68 | 1.5E-01 | 2.5E-01       | 35               | 0.24              | 0.43                 | 0.10      |
| TGCT        | 14               | 68     | 0.52 | 3.9E-01 | 4.9E-01       | 13               | -0.01             | 0.14                 | -0.22     |
| THCA        | 5                | 326    | 0.42 | 7.7E-01 | 8.3E-01       | 0 and 100        | 0.00              | 0.00                 | 0.00      |
| COAD        | 3                | 99     | 0.34 | 8.3E-01 | 8.3E-01       | 82               | 0.31              | 0.33                 | 0.00      |

**Supplementary Table 2:** Predictivity of the HRDsum score for HRR status (class H1a BA/HM vs. class H3) and optimization of the cutpoints. The analysis was performed for cancer types with at least three tumors in the class H1a BA/HM. Optimal cutpoints for HRDsum refer to maximization of Youdens's index  $J = \text{sensitivity} + \text{specificity} - 1$ . Values for J are listed for the cutpoint 42, the optimal cutpoint and a leave-one-out cross-validation (loocv) analysis.

a

## WES data

| class      | N (class) | cutpoint | sensitivity (%) | specificity (%) | PPV (%) | NPV (%) |
|------------|-----------|----------|-----------------|-----------------|---------|---------|
| H1a, BA/HM | 93        | 42       | 100             | 40.2            | 43.3    | 100     |
| H1a        | 97        | 42       | 97.9            | 40              | 44.2    | 97.6    |
| H1a + H1b  | 129       | 42       | 87.6            | 39.3            | 52.6    | 80.5    |
| H1a + H2a  | 99        | 42       | 98              | 40.4            | 45.1    | 97.6    |
| H1 + H2    | 203       | 42       | 80.3            | 44.7            | 75.8    | 51.2    |
| H1a, BA/HM | 93        | 50       | 97.8            | 54.4            | 49.5    | 98.2    |
| H1a        | 97        | 50       | 95.9            | 54.5            | 50.5    | 96.5    |
| H1a + H1b  | 129       | 50       | 81.4            | 53              | 57.1    | 78.8    |
| H1a + H2a  | 99        | 50       | 96              | 55.1            | 51.6    | 96.5    |
| H1 + H2    | 203       | 50       | 73.4            | 62.8            | 81      | 52.2    |

b

## Genotyping data (SNP arrays)

| class      | N (class) | cutpoint | sensitivity (%) | specificity (%) | PPV (%) | NPV (%) |
|------------|-----------|----------|-----------------|-----------------|---------|---------|
| H1a, BA/HM | 93        | 42       | 98.9            | 47.1            | 46      | 99      |
| H1a        | 97        | 42       | 97.9            | 47.5            | 47.5    | 97.9    |
| H1a + H1b  | 129       | 42       | 88.4            | 48.8            | 57      | 84.5    |
| H1a + H2a  | 99        | 42       | 98              | 48              | 48.5    | 97.9    |
| H1 + H2    | 203       | 42       | 78.3            | 56.4            | 79.5    | 54.6    |
| H1a, BA/HM | 93        | 50       | 94.6            | 65.7            | 55.7    | 96.4    |
| H1a        | 97        | 50       | 93.8            | 66.5            | 57.6    | 95.7    |
| H1a + H1b  | 129       | 50       | 79.8            | 67.3            | 65.2    | 81.3    |
| H1a + H2a  | 99        | 50       | 93.9            | 67.2            | 58.9    | 95.7    |
| H1 + H2    | 203       | 50       | 63.5            | 69.1            | 81.6    | 46.8    |

**Supplementary Table 3:** Performance of HRDsum in the detection of HRR gene-altered ovarian carcinoma (TCGA-OV cohort). The classification task was to separate tumors in the listed class from tumors not in the listed class. **a** HRDsum calculated from WES data. **b** HRDsum calculated from genotyping data.

### Sample classification

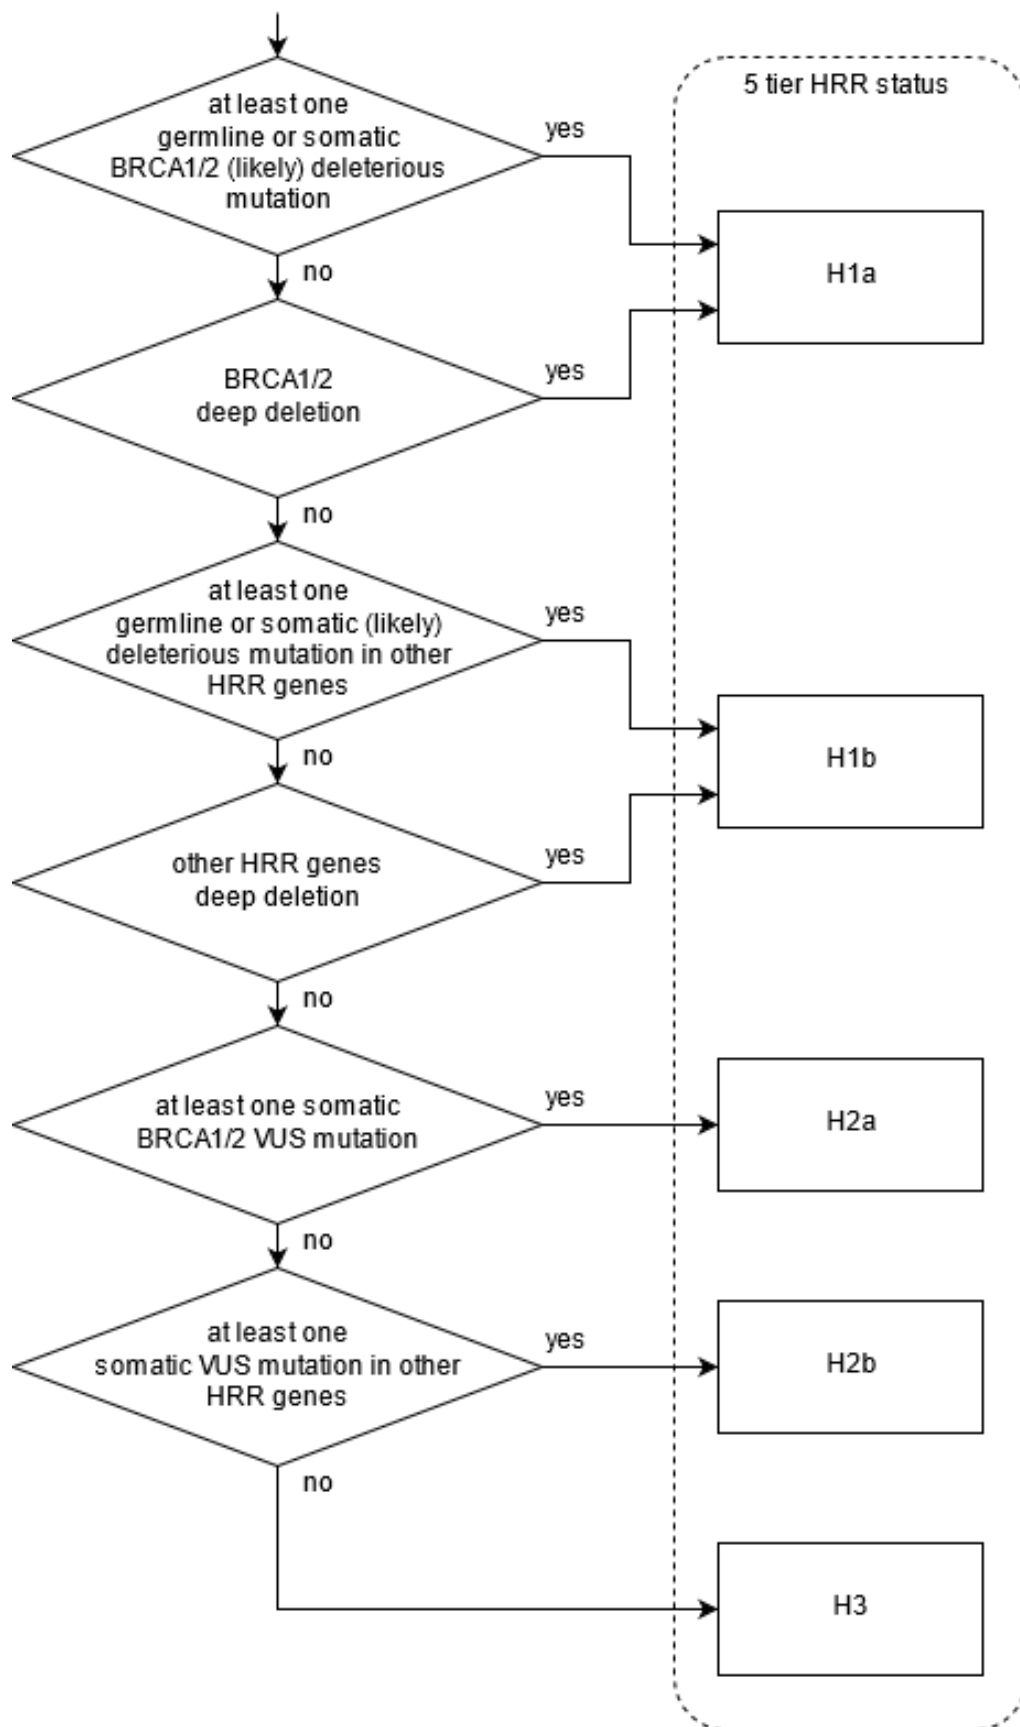

**Supplementary Figure 1:** Classification of HRR gene alterations resulting in a 5-tier classification system. Of a total of 8847 TCGA tumors 356 (4%) had deleterious *BRCA1/2* alterations (class H1a), 2277 (26%) deleterious alterations in other HRR genes (class H1b), 174 (2%) had VUS in *BRCA1/2* (class H2a) and 2267 (26%) had VUS in other HRR genes (class H2b).

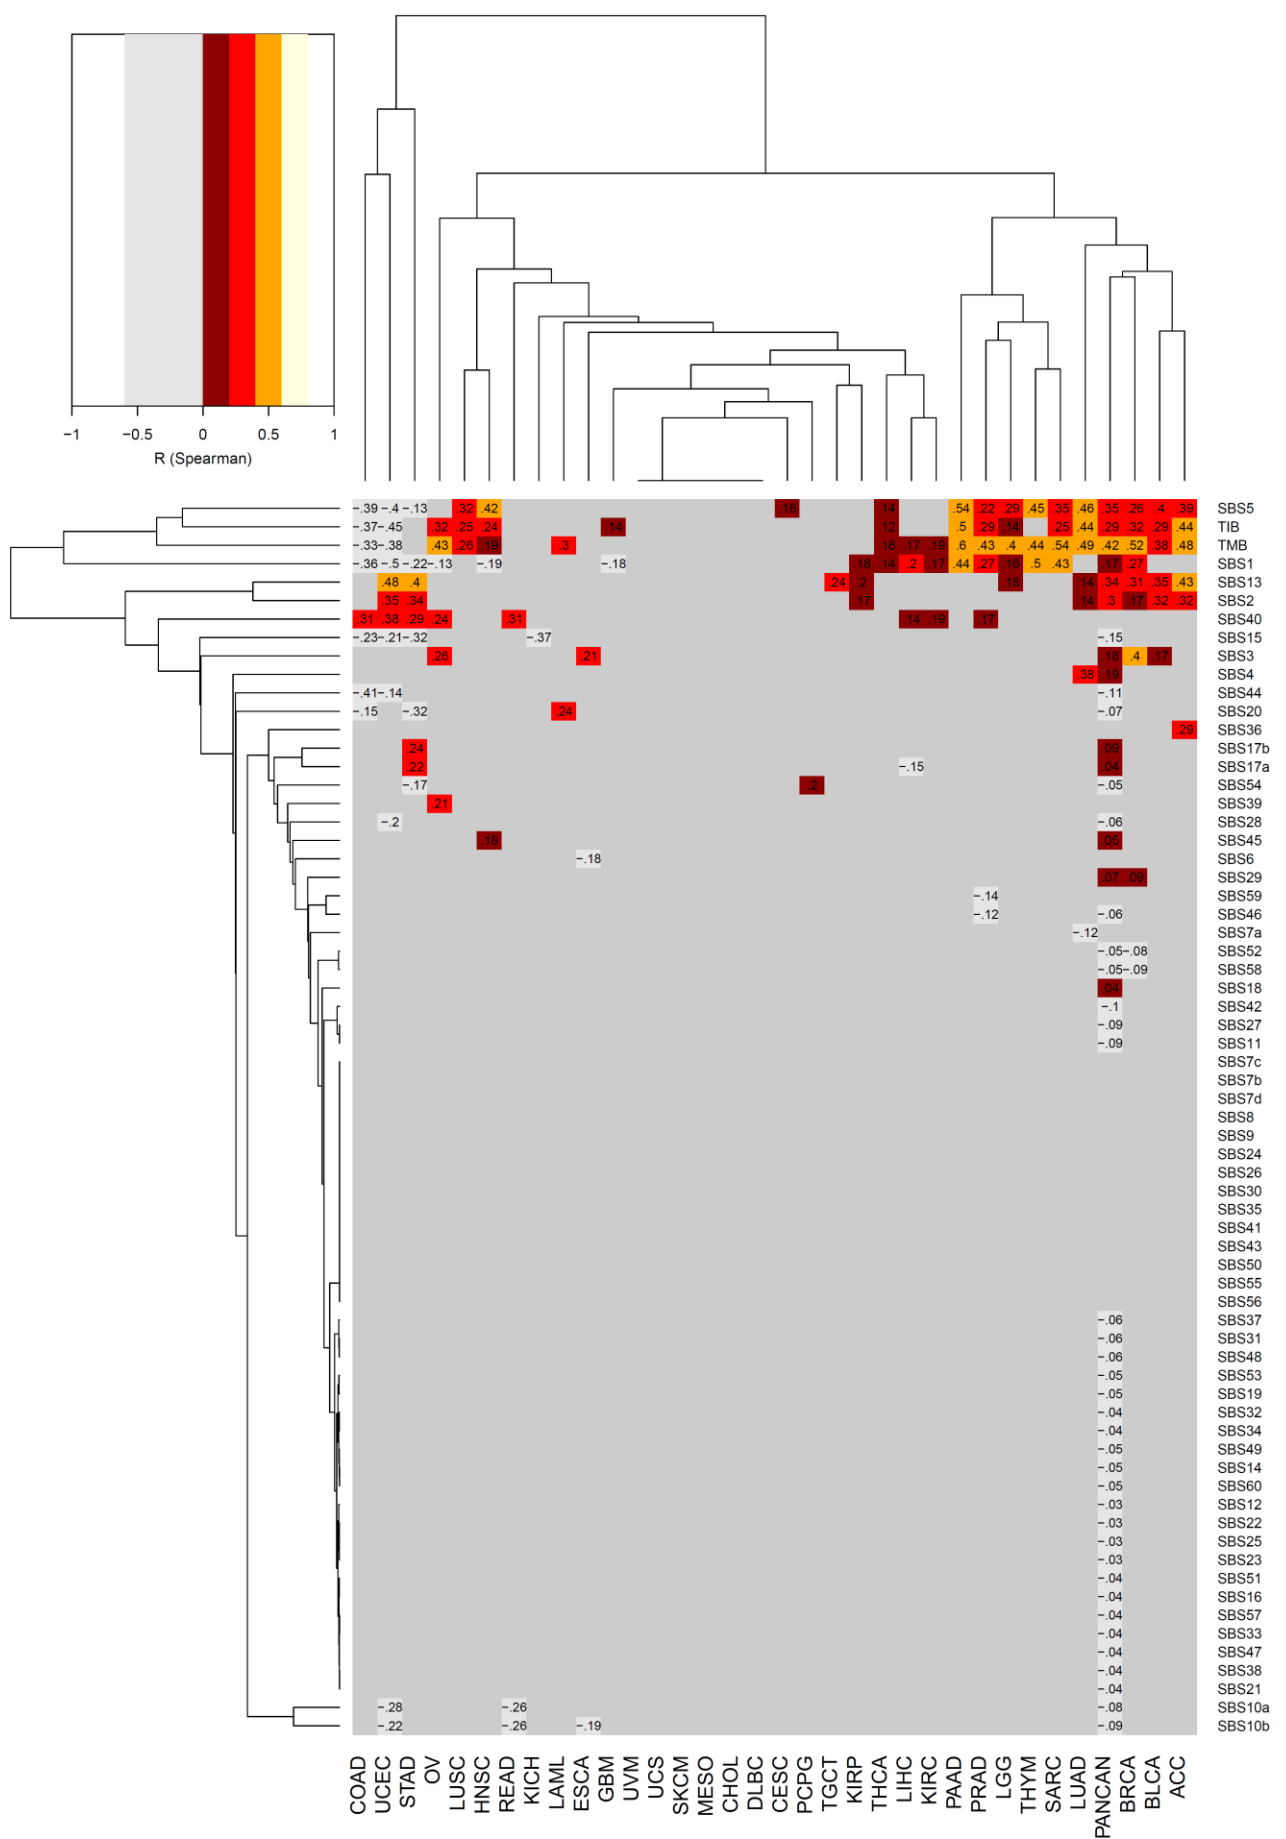

**Supplementary Figure 2:** Correlation analysis of TMB, TIB and the SBS mutational signatures with HRDsum pan-cancer and within specific cancer types. Significant positive correlations are shown in heat colors, while significant negative correlations are shown in light grey (FDR = 10%).

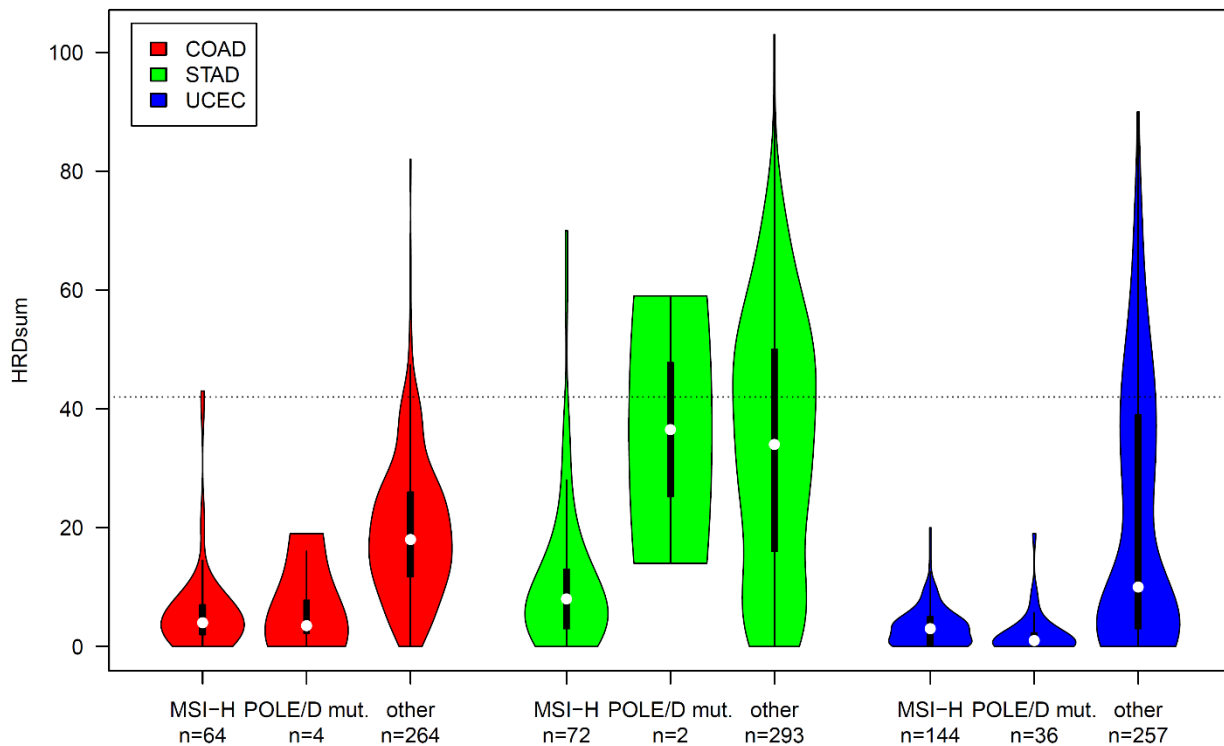

**Supplementary Figure 3:** HRDsum was lower in microsatellite-*instable* (MSI-H) and *POLE/D*-mutated tumors compared to tumors without these alterations in COAD, STAD and UCEC.

a

Class H1a, BA vs. class H3

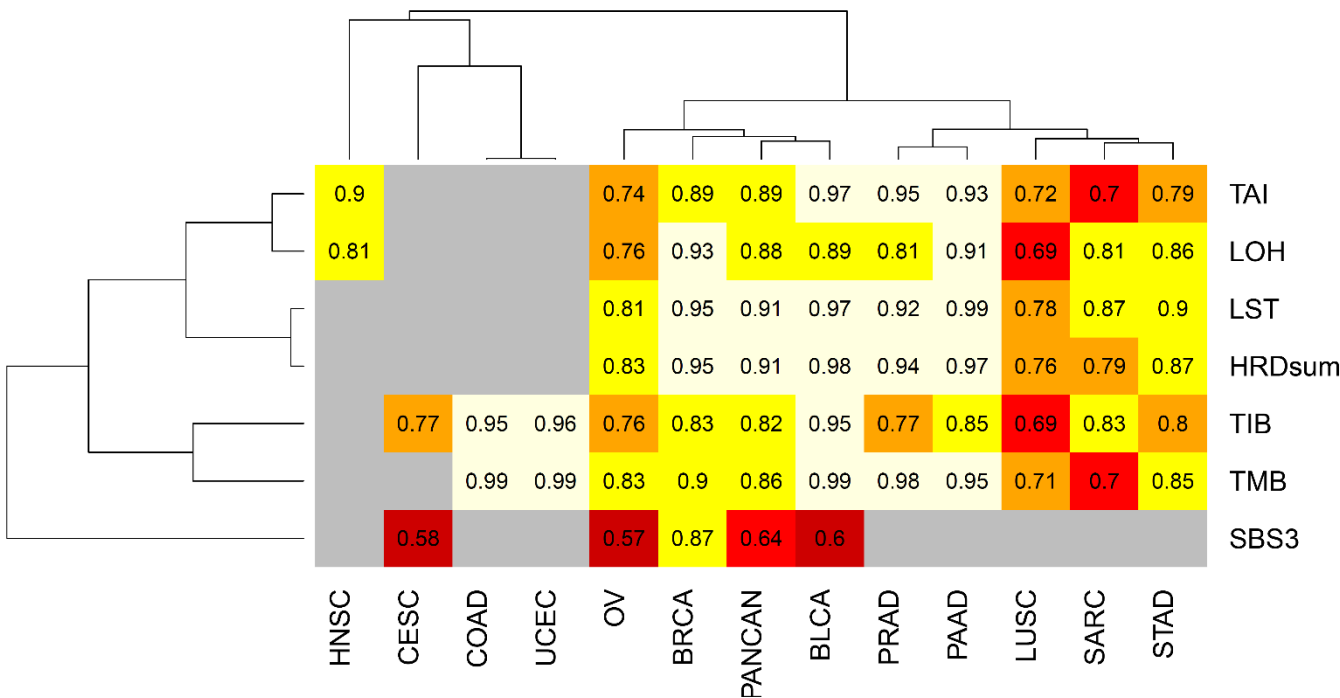

b

Class H1a, MA vs. class H3

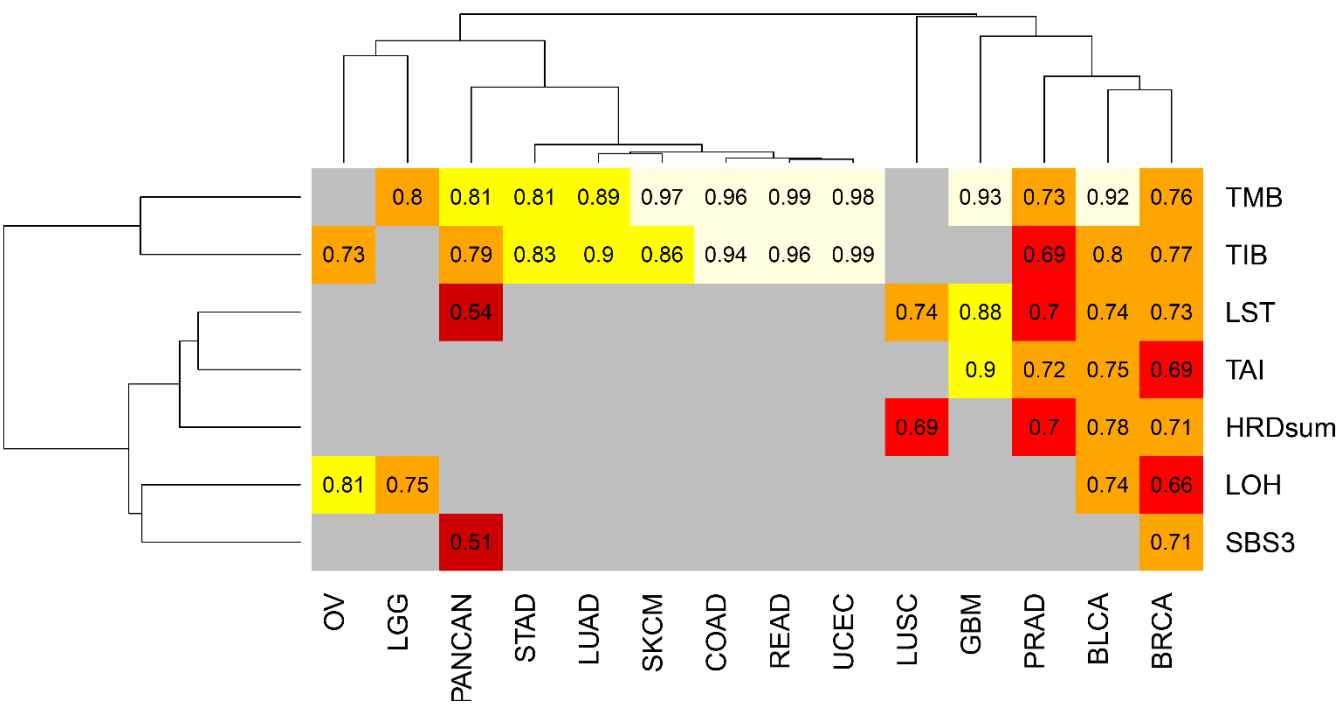

**Supplementary Figure 4:** Predictivity of HRDsum for biallelic (BA) and for monoallelic (MA) *BRCA1/2* alterations. **a** ROC analysis of tumors with biallelic *BRCA1/2* alterations (class H1a, BA) versus tumors with unaffected HRR genes (class H3). **b** ROC analysis of tumors with monoallelic *BRCA1/2* alterations (class H1a, MA) versus tumors with unaffected HRR genes (class H3).





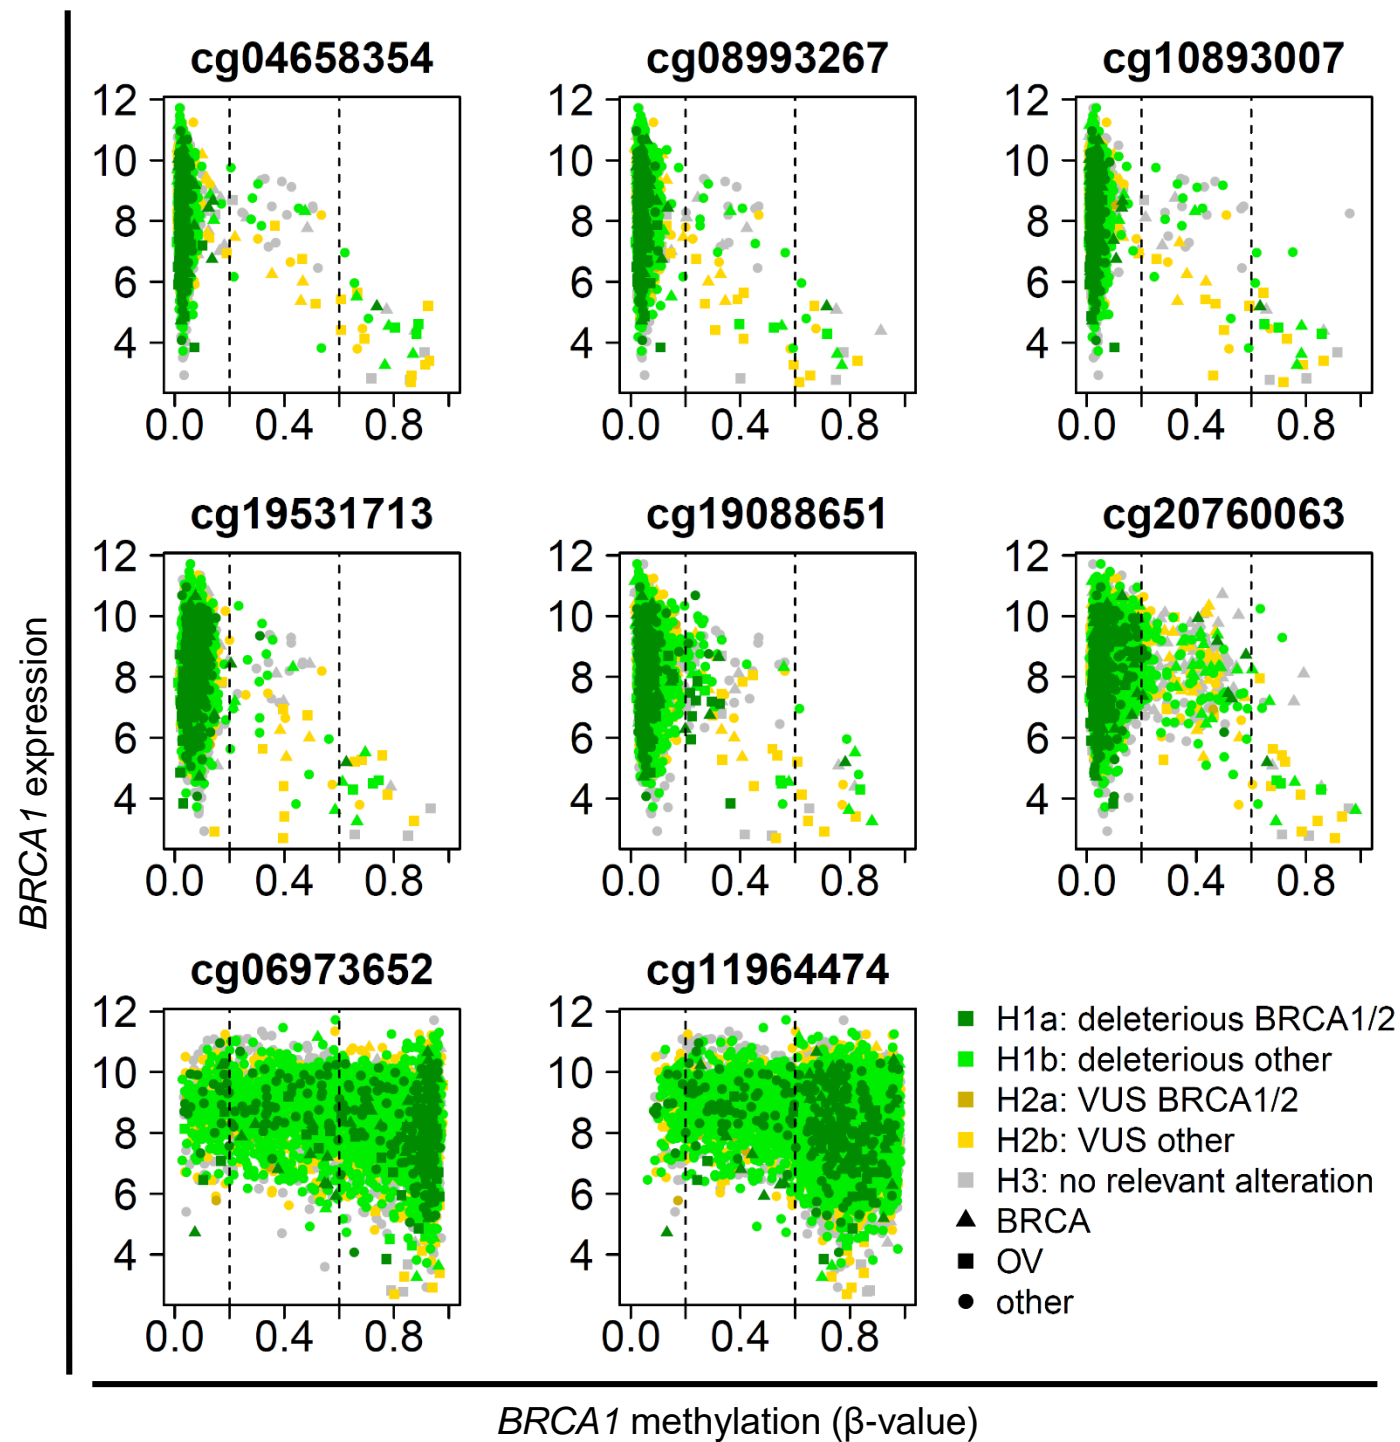

**Supplementary Figure 6:** Correlation of *BRCA1* expression (log<sub>2</sub> scale) and *BRCA1* methylation (beta-values). Tumors were classified as strongly hypermethylated if  $\beta \geq 0.6$  and as moderately hypermethylated if  $\beta \geq 0.2$  for at least one of the CpG sites cg04658354, cg08993267, cg10893007 and cg19531713.

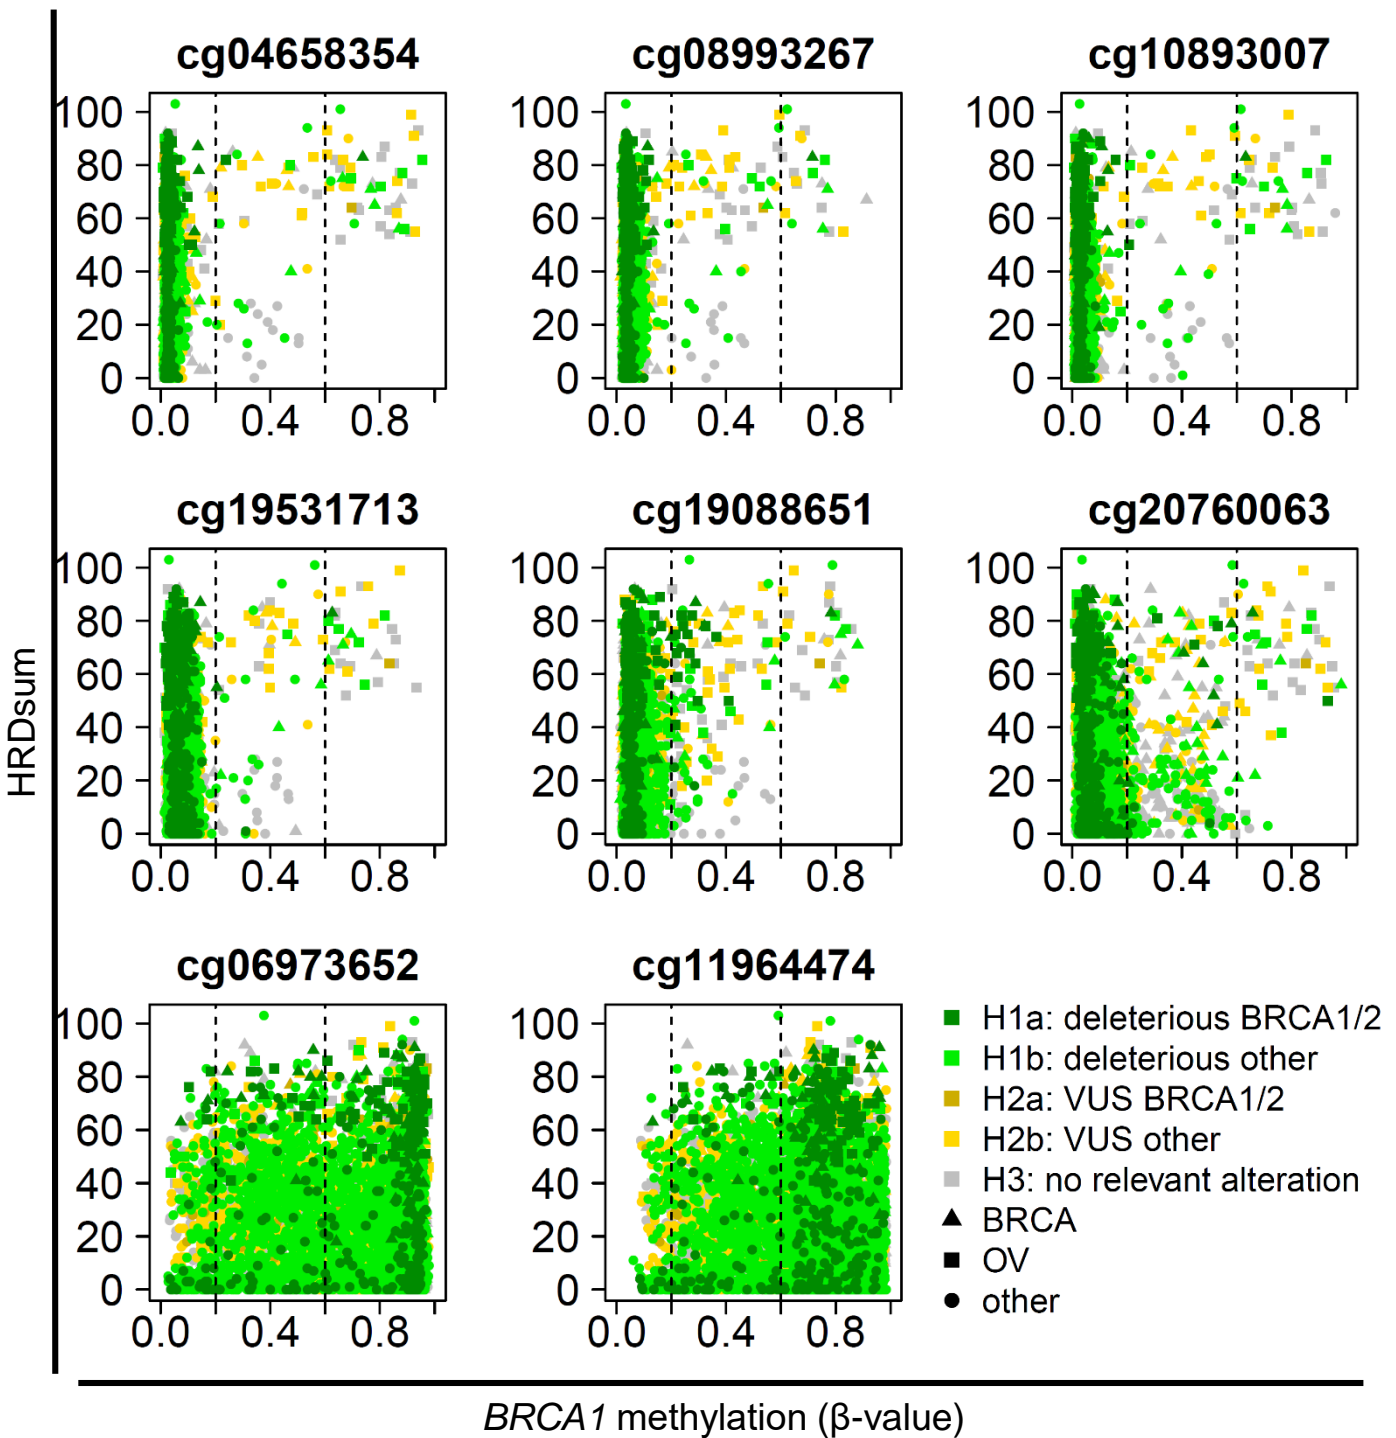

**Supplementary Figure 7:** Correlation of HRDsum and *BRCA1* methylation (beta-values). Tumors were classified as strongly hypermethylated if  $\beta \geq 0.6$  and as moderately hypermethylated if  $\beta \geq 0.2$  for at least one of the CpG sites cg04658354, cg08993267, cg10893007 and cg19531713.

**a**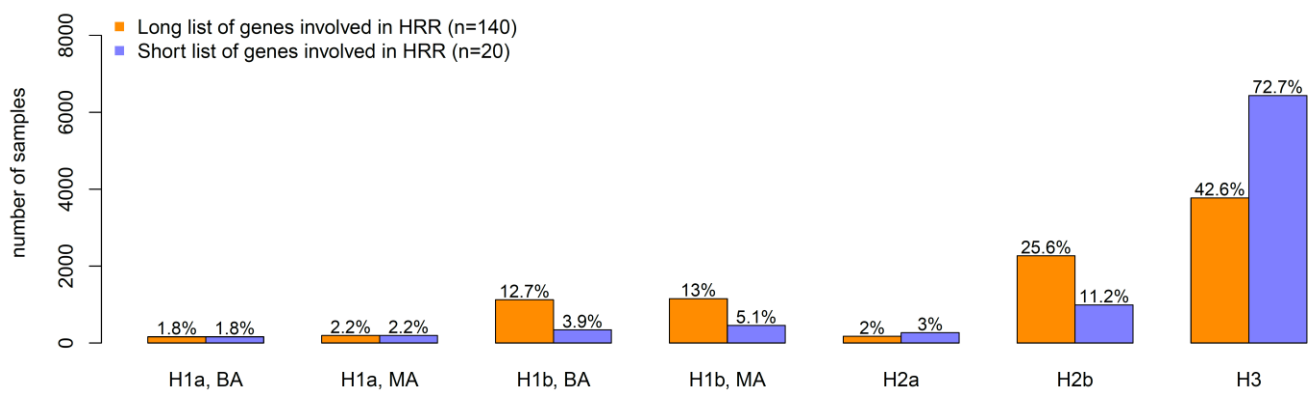**b**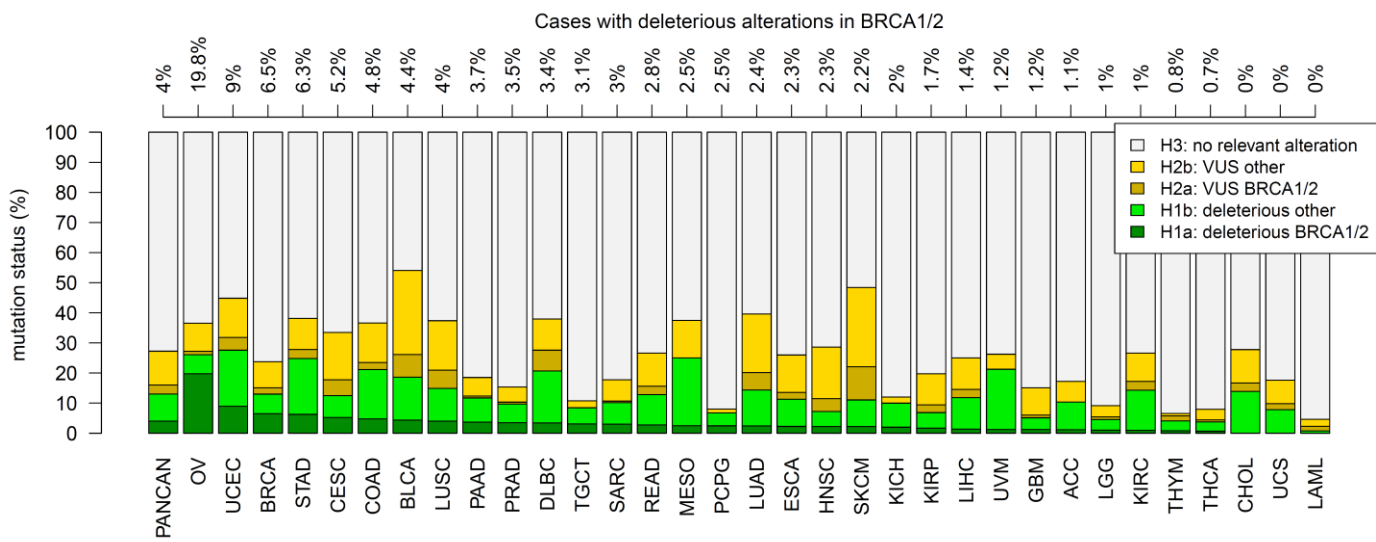**c**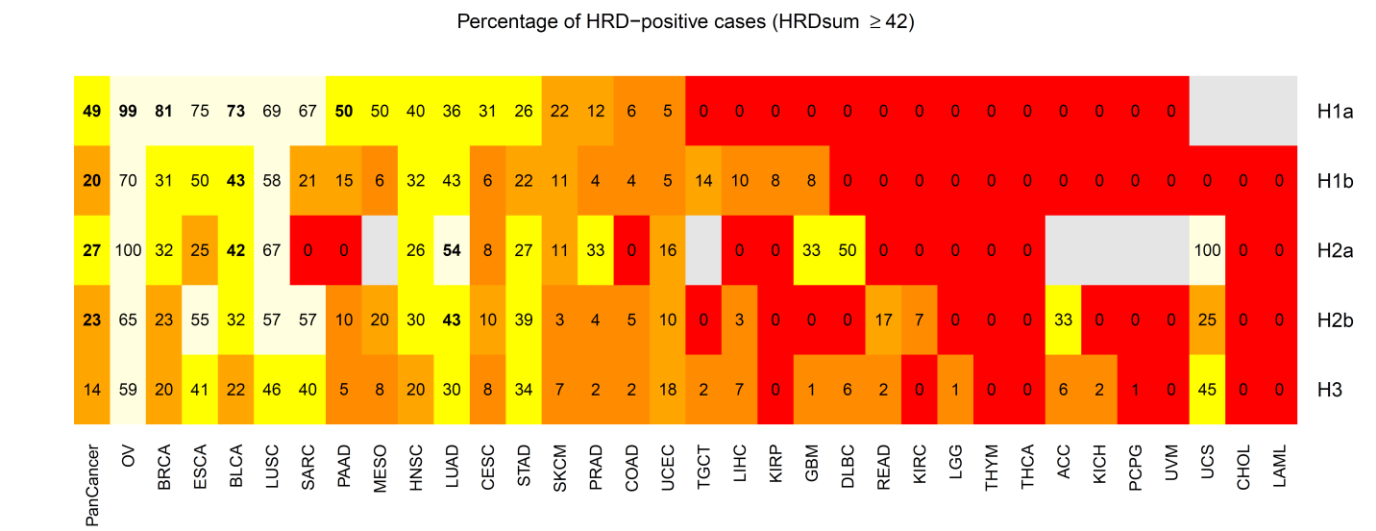

**Supplementary Figure 8:** Using a short list (n=20) instead of a long list (n=140) of HRR genes for tumor classification. **a** Numbers of tumors in the classes H1-H3 across all cancer types. MA = monoallelic alteration, BA = biallelic alteration. **b** Tumors with deleterious alterations in *BRCA1/2* (H1a), in other HRR genes (H1b), VUS in *BRCA1/2* (H2a) and in other HRR genes (H2b). Same as Fig. 1 A, but for the short gene list. **c** Percentage of HRD-positive (HRDsum ≥ 42) tumors in the five classes H1a-H3 (grey = no cases). Significant enrichments of HRD-positive tumors compared to H3 are shown in bold face. Same as Fig. 1C, but for the short gene list.

**a**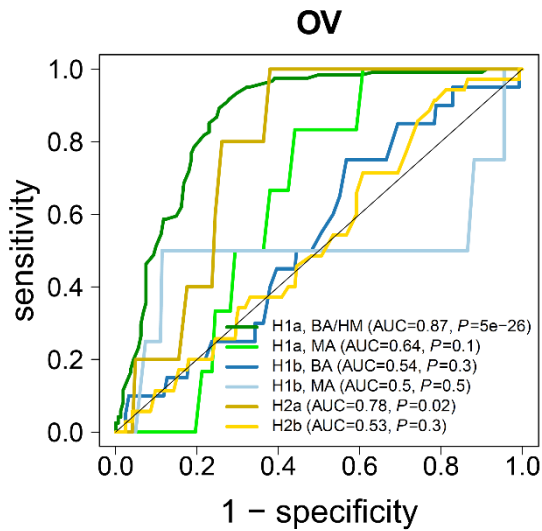**b**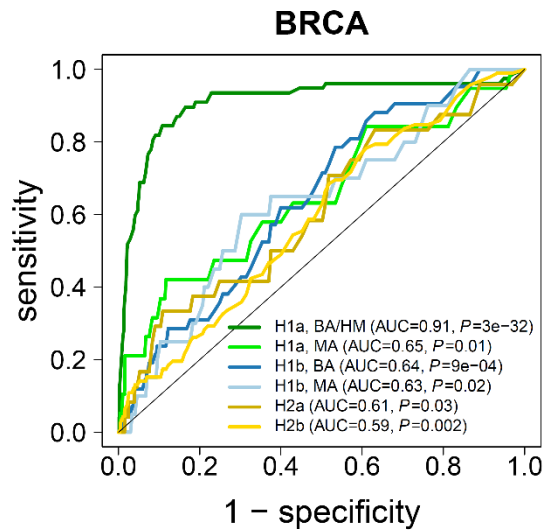**c**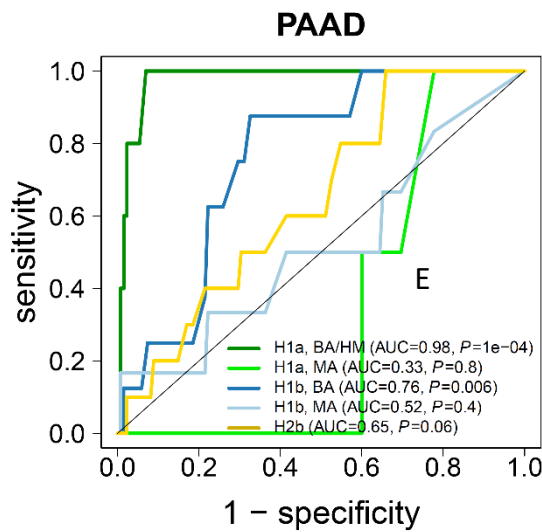**d**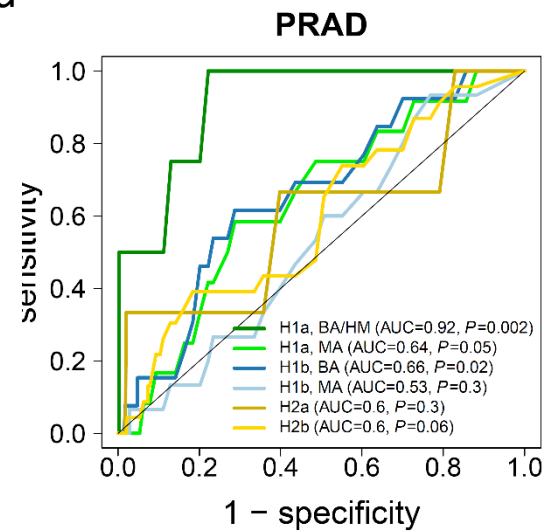**e**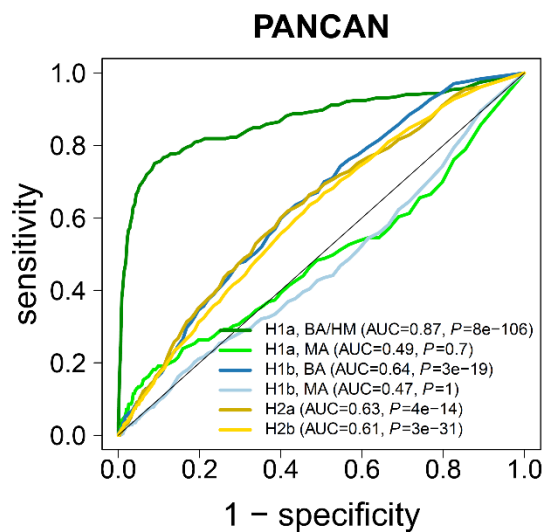

**Supplement Figure 9:** Separation of tumors with alterations in HRR genes (classes H1a-H2b) from tumors without such alterations (class H3) by HRDsum. Same as Fig. 5, but the short list ( $n=20$ ) of HRR genes was used for tumor classification. **a** Ovarian cancer (OV). **b** Breast cancer (BRCA). **c** Pancreatic adenocarcinoma (PAAD). **d** Prostate adenocarcinoma (PRAD). **e** Across 33 cancer types (PANCAN).

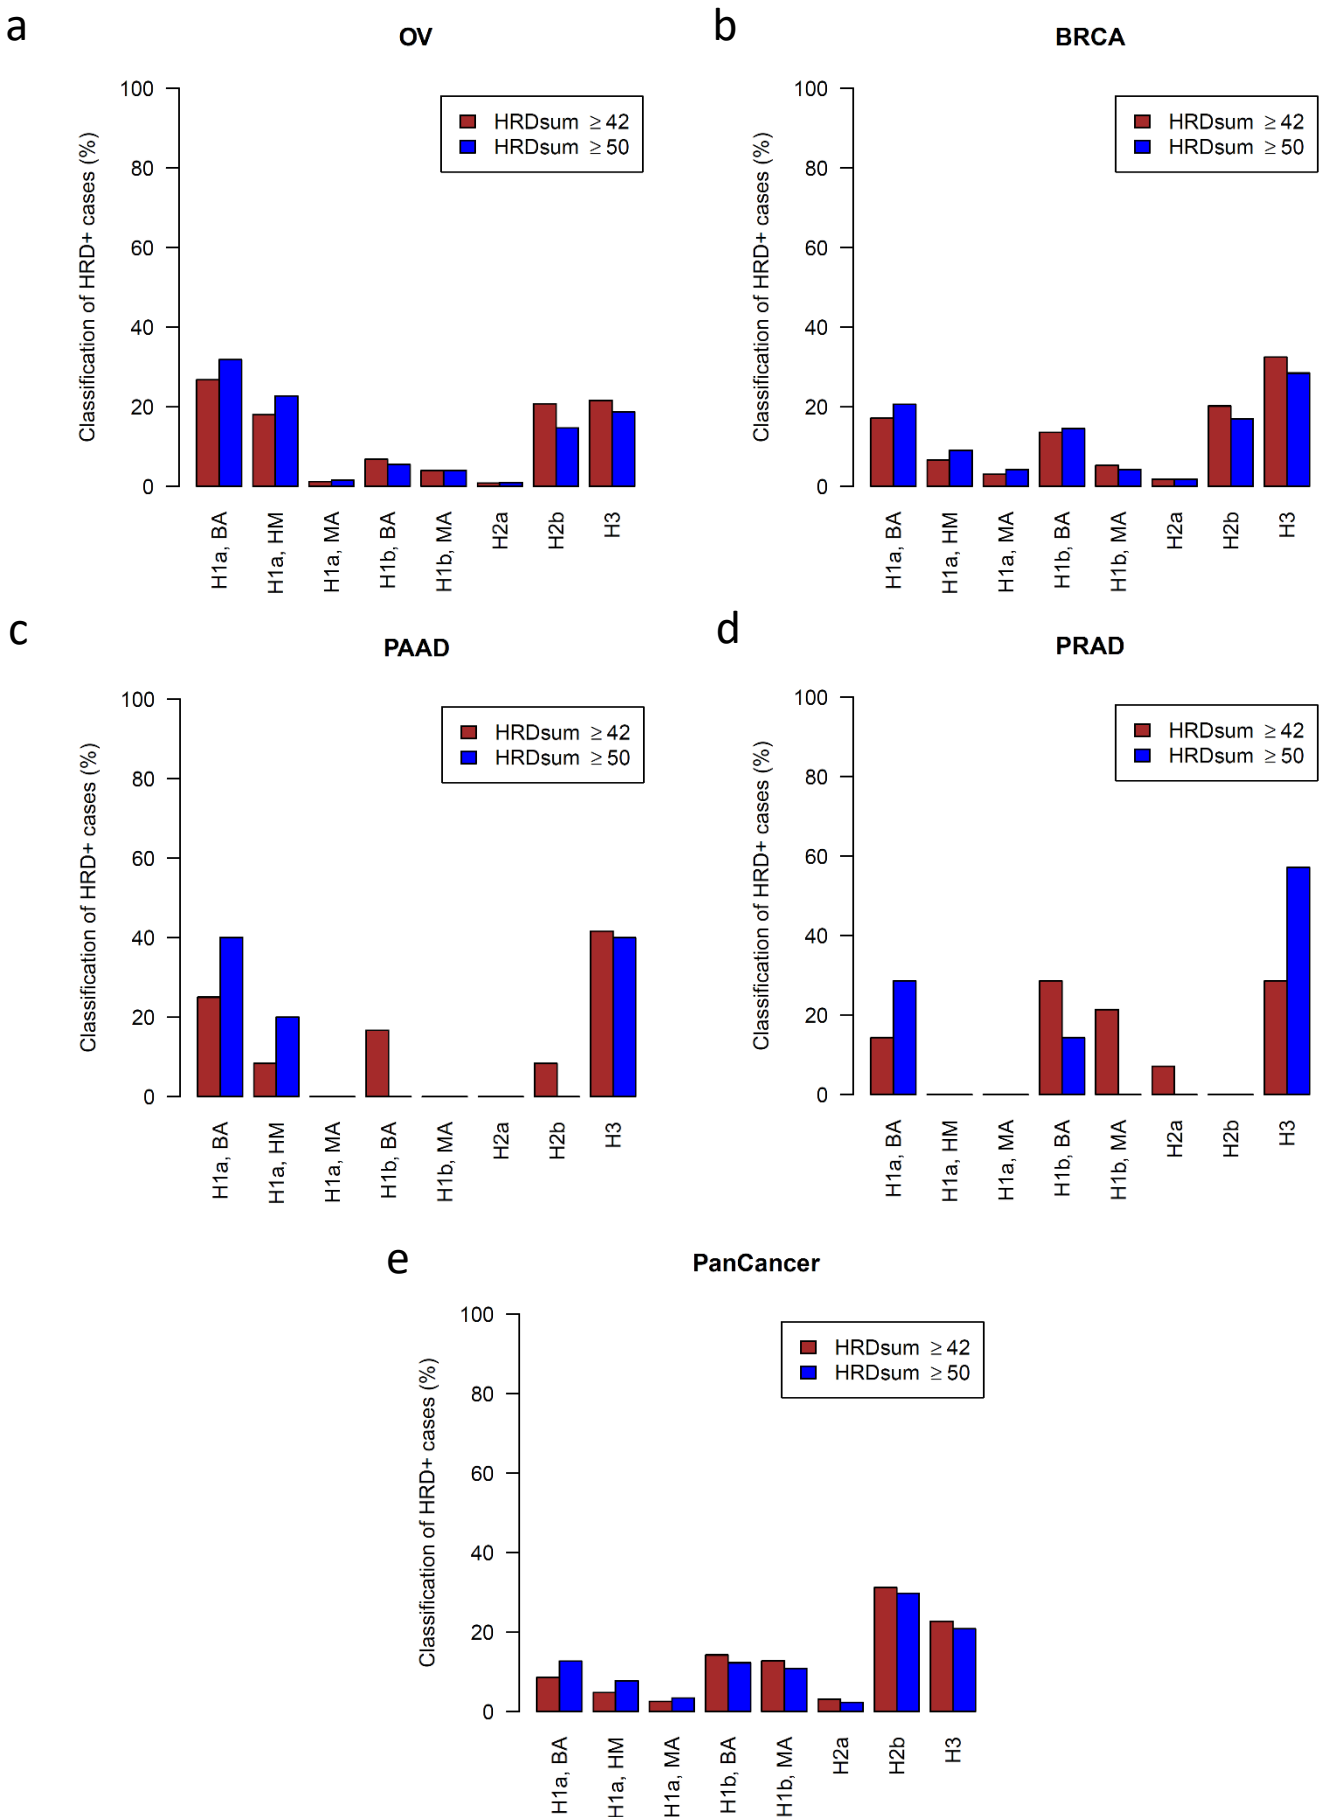

**Supplementary Figure 10:** Explanation of high HRDsum scores (HRDsum  $\geq 42$ ) by genetic and epigenetic alterations in HRR genes. **a** Ovarian cancer (OV). **b** Breast cancer (BRCA). **c** Pancreatic adenocarcinoma (PAAD). **d** Prostate adenocarcinoma (PRAD). **e** Across 33 cancer types (PanCancer).

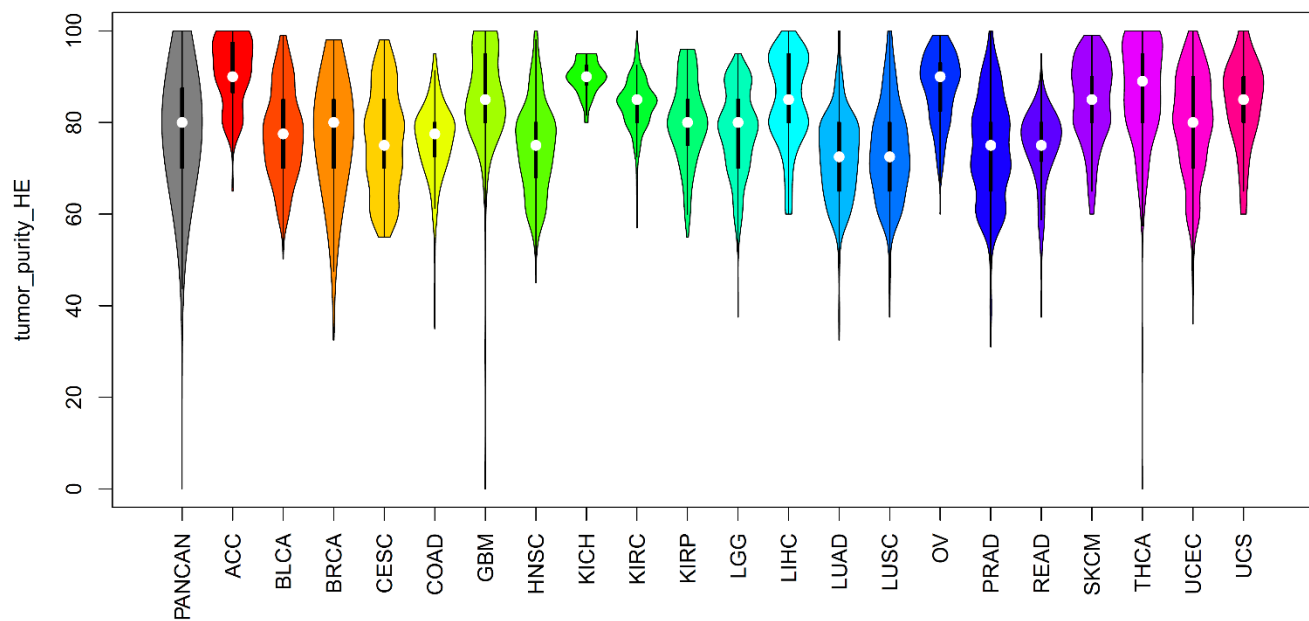

**Supplementary Figure 11:** Tumor purity in the TCGA cohort. Tumor cell content determined by pathologists from HE-stained slides. It was planned to include only samples with minimum tumor content 80% in the TCGA cohort.

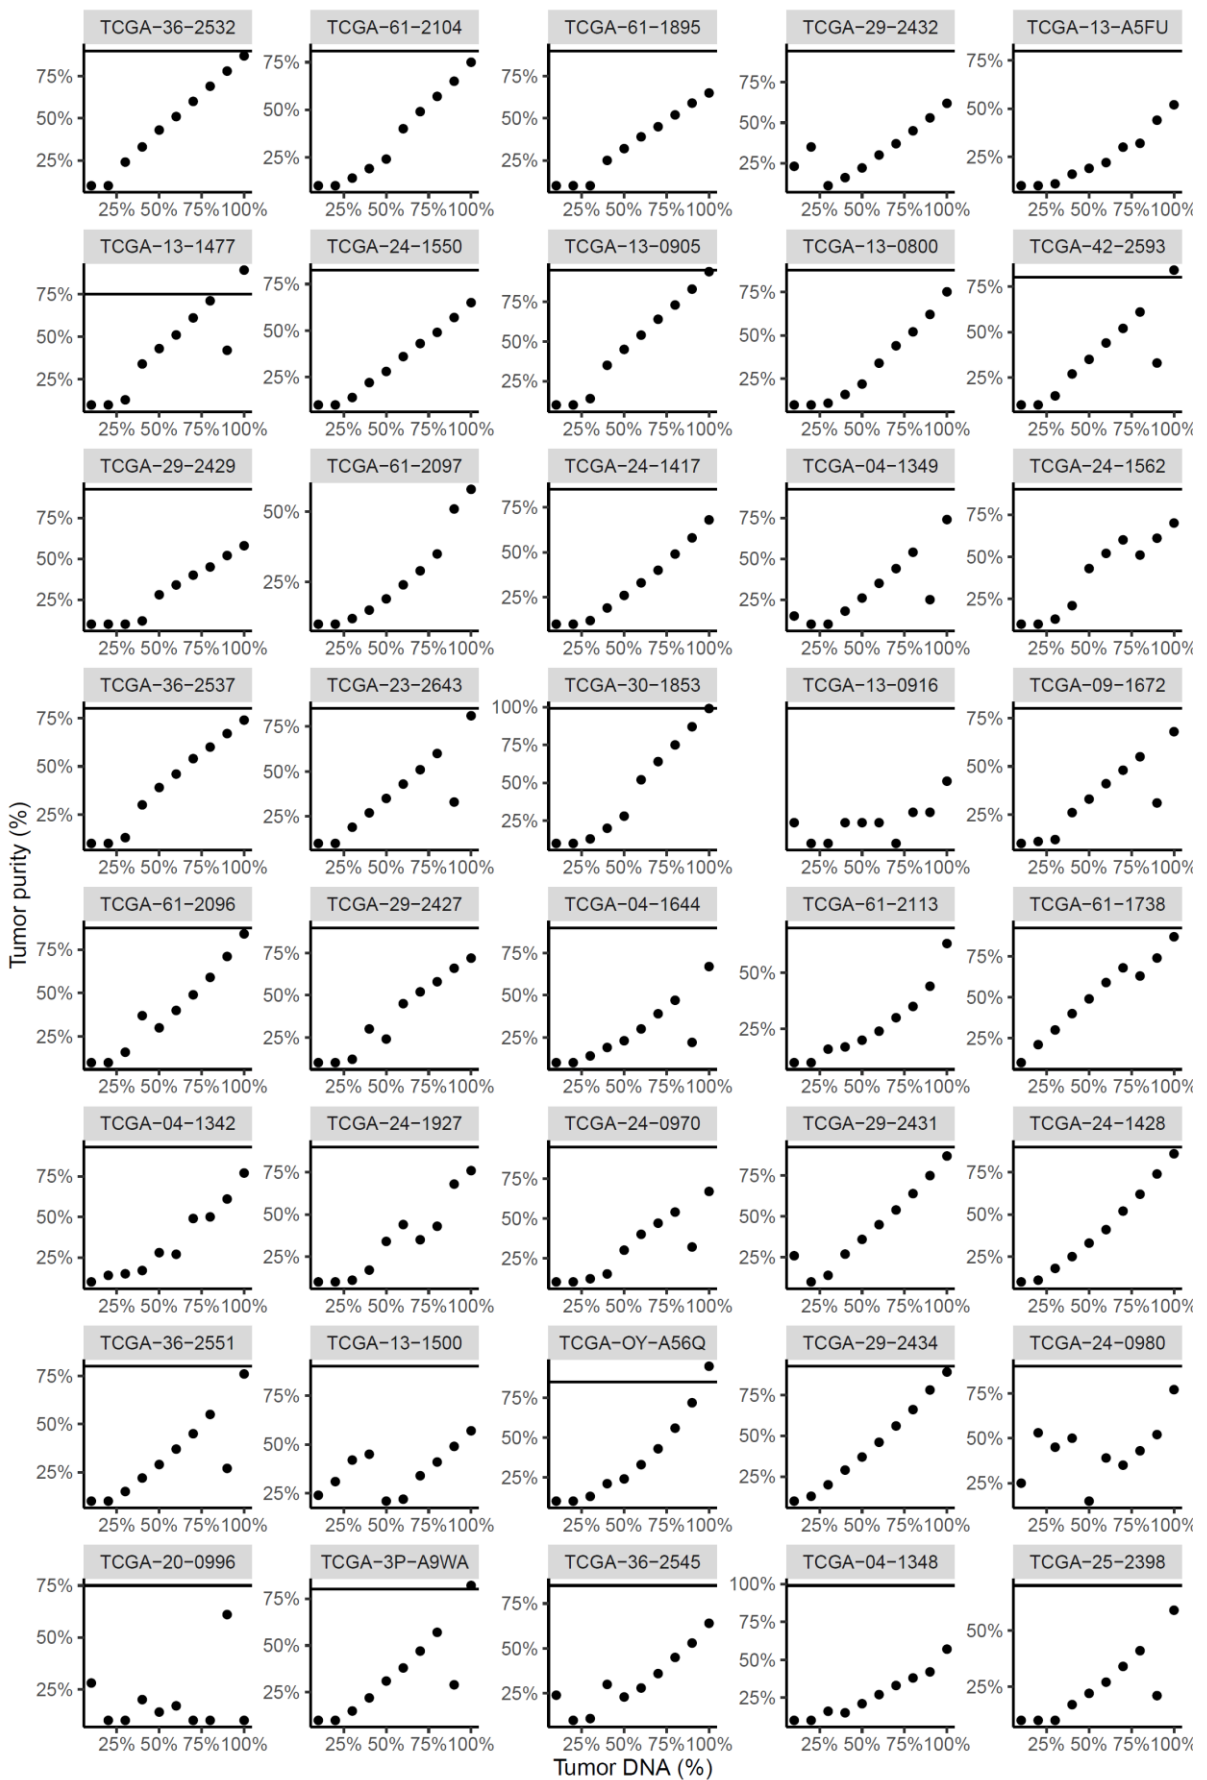

**Supplementary Figure 12:** *In silico* dilution experiment including 10%, ..., 100% of reads from tumor DNA samples and 90%, ..., 0% of reads from the corresponding normal DNA samples. Correlation of tumor purity (estimated by Sequenza) with the level of dilution.



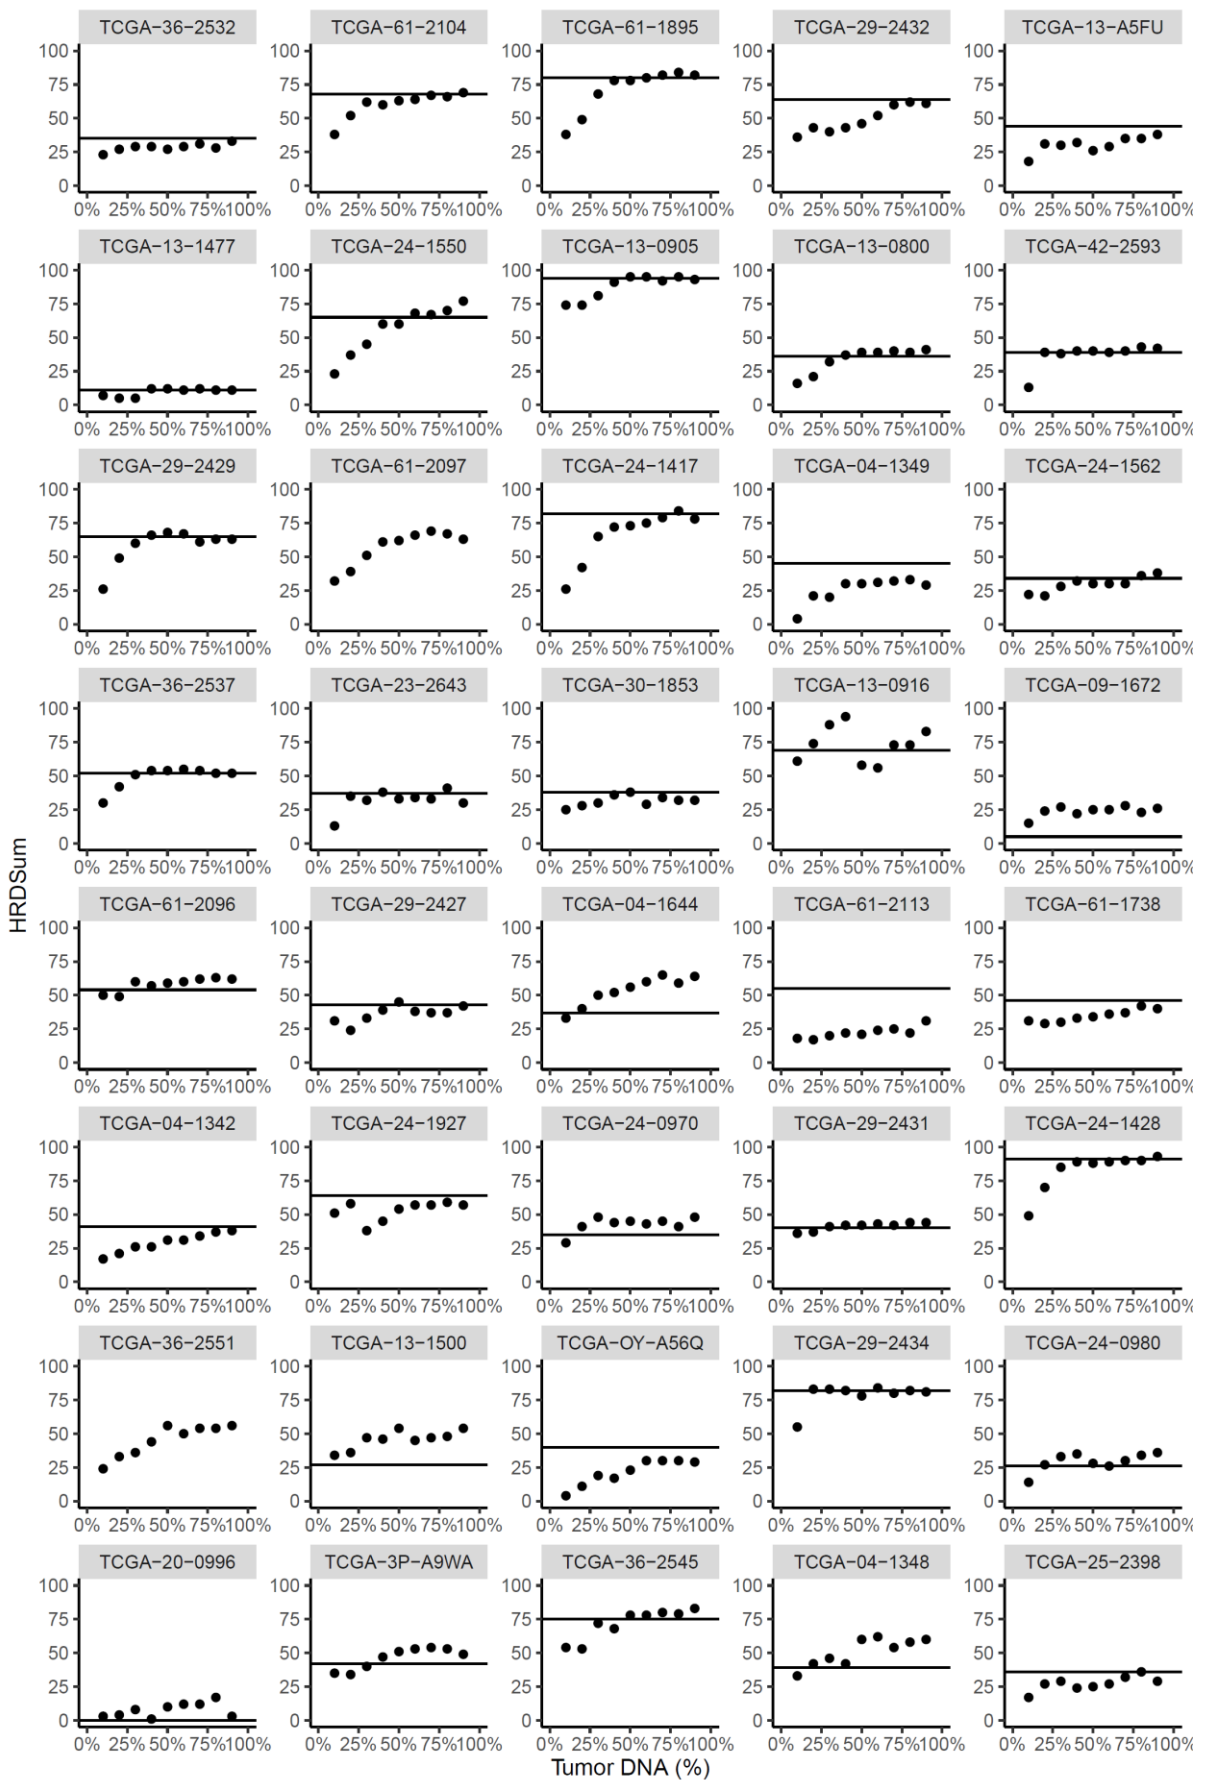

**Supplementary Figure 13:** *In silico* dilution experiment including 10%, ..., 100% of reads from tumor DNA samples and 90%, ..., 0% of reads from the corresponding normal DNA samples. HRDsum scores calculated from WES data (dilution series, points) and from genotyping data (undiluted samples, line).
